# Supplementary material
Source: ML conference proceedings conference paper supplement (https://proceedings.neurips.cc/paper_files/paper/2016/hash/8698ff92115213ab187d31d4ee5da8ea-Abstract.html)
Supplement: Supplementary file 1 [file 8698ff92115213ab187d31d4ee5da8ea-Supplemental.zip]

Archive with 1 entries (1 files):
- supplement_final.pdf
